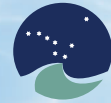

## Contribution to Special Issue: 'Towards a Broader Perspective on Ocean Acidification Research Part 2'

### Original Article

# Effects of elevated CO<sub>2</sub> and temperature on an intertidal harpacticoid copepod community

Visnu Cunha Sarmiento<sup>1\*</sup>, Paulo Jorge Parreira Santos<sup>1</sup>, Rachel Hale<sup>2</sup>, Jeroen Ingels<sup>3</sup> and Stephen Widdicombe<sup>3</sup>

<sup>1</sup>Dept. Zoologia, Centro de Ciências Biológicas, Universidade Federal de Pernambuco, Av. Prof. Moraes Rêgo s/n, Recife, Pernambuco 50670-420, Brazil

<sup>2</sup>Ocean and Earth Science, National Oceanography Centre, Southampton, University of Southampton Waterfront Campus, European Way, Southampton SO14 3ZH, UK

<sup>3</sup>Plymouth Marine Laboratory, Prospect Place, West Hoe, Plymouth PL1 3DH, UK

\*Corresponding author: tel: +55 81 21268854; fax: +55 81 21268353; e-mail: visnu.ubi@gmail.com

Sarmiento, V. C., Parreira Santos, P. J., Hale, R., Ingels, J. and Widdicombe, S. Effects of elevated CO<sub>2</sub> and temperature on an intertidal harpacticoid copepod community. – ICES Journal of Marine Science, 74: 1159–1169.

Received 6 June 2016; revised 30 September 2016; accepted 10 October 2016; advance access publication 10 December 2016.

Warming and ocean acidification have been shown to have significant impacts on marine organisms. However, none studies have addressed the impact of these two stressors on harpacticoid copepod community structure. A mesocosm experiment was conducted to assess the potential interactive impact of different levels of elevated CO<sub>2</sub> and temperature on an intertidal harpacticoid copepod community. Artificial substrate units (ASUs) colonized by meiofauna from the extreme low intertidal zone were exposed to eight experimental treatments (four pH levels: 8.0, 7.7, 7.3 and 6.7, crossed with two temperature levels: 12 and 16 °C). After 60 days exposure communities were significantly affected by both stressors. The dominant harpacticoid species were mainly affected at treatments held at pH 6.7, but with divergent biological response patterns. At pH 6.7 *Tisbe* sp and *Ectinosoma* sp2 exhibited important density reductions, while considerable density increases were observed for *Amphiascus longarticulatus* and *Amphiascoides golikovi*. This study has demonstrated that elevated levels of CO<sub>2</sub> and ocean warming may have substantial effects on the structure of harpacticoid communities. Importantly, the increase in malformations observed at pH 6.7 indicated that we need to consider sub-lethal effects that could have consequences for populations after long periods of exposure.

**Keywords:** benthos, climate change, meiofauna, ocean acidification, warming.

## Introduction

The increasing concentration of atmospheric carbon dioxide (CO<sub>2</sub>) is altering the levels of co-occurring stressors, resulting in increasing sea surface temperatures and seawater pCO<sub>2</sub>, as well as decreasing the oceans' pH and its level of saturation of carbonate minerals (Feely *et al.*, 2009). Since the beginning of the industrial revolution in the mid-eighteenth century, the release of CO<sub>2</sub> from human activities has resulted in an increase in atmospheric CO<sub>2</sub> concentrations by nearly 40% (Feely *et al.*, 2009). The present Earth's atmospheric CO<sub>2</sub> levels are higher than at anytime in at least the last 800 000 years (Lüthi *et al.*, 2008), and is expected

to continue to rise at an accelerating rate (Feely *et al.*, 2009). Globally averaged combined land and ocean surface temperature data show a warming of 0.85 [0.65–1.06] °C over the period 1880–2012 (IPCC, 2014).

Owing to its large volume and the ability of seawater to buffer CO<sub>2</sub>, the ocean has absorbed nearly one-third of all the anthropogenic carbon added to the atmosphere, attenuating the overall effects (Sabine *et al.*, 2004). However, oceanic uptake of CO<sub>2</sub> has resulted in changes in seawater carbonate chemistry, a process known as “ocean acidification” and the pH of ocean

surface water has decreased by 0.1 units since the beginning of the industrial era, corresponding to a 26% increase in acidity (IPCC, 2014).

The rise in greenhouse gas (primarily CO<sub>2</sub>) atmospheric concentration is predicted to continue, with estimates for the year 2100 ranging from 475 to 1313 ppm (IPCC, 2013). Best estimates of ocean warming in the top 100 m of the water column are about 0.6–2.0 °C by the end of the 21st century (IPCC, 2013). However, an additional warming of global mean surface temperatures is forecasted to reach 2.6–4.8 °C by the end of 21st century (IPCC, 2014). As a consequence of ocean CO<sub>2</sub> uptake, an additional drop in ocean pH of 0.3 units by 2100 and 0.7 units by 2250 is predicted (Caldeira and Wickett, 2003).

Climate change is causing alterations to marine ecosystems with impacts that are evident from polar to tropical regions (Harley *et al.*, 2006; IPCC, 2014). Temperature and pH are among the most important environmental factors controlling the distribution, physiological performance, morphology, and behaviour of marine invertebrates (e.g. Pörtner, 2008; Widdicombe and Spicer, 2008; Doney *et al.*, 2009). However, global warming and ocean acidification are the two major consequences of climate change that are being observed.

Environmental stressors can have simple additive effects (both significant, but no significant interaction) or have complex interactive effects where they have synergistic (increased stress) or antagonistic (decreased stress) effects on biological processes (Folt *et al.*, 1999). Despite the well-known controlling influence of temperature on metabolism and development, the interactive effects of ocean warming and CO<sub>2</sub>-driven acidification on organisms at community level have been poorly studied and require use of factorial experimental designs.

Harpacticoid copepods are usually the most important meiofaunal group in terms of abundance in phytal areas with high diversity (Giare, 2009). Owing to their high-nutritional value, they are a predominant element in the diet of many fishes of both ecological and economic importance (Huys and Boxshall, 1991). Furthermore, copepods have been extensively used to show natural environmental changes (e.g. Sarmiento *et al.*, 2012; Kitahashi *et al.*, 2014) as well as to evaluate different types of human impacts (e.g. Sarmiento and Santos, 2012; Costa *et al.*, 2016). Owing to the greater sensitivity that harpacticoid copepods can exhibit in comparison to other dominant meiofaunal groups such as nematodes (Hale *et al.*, 2011; Sarmiento *et al.*, 2015), they have been recently suggested as a valuable group for predicting climate changes (Zeppilli *et al.*, 2015). However, no studies on how the combination of elevated seawater CO<sub>2</sub> and temperature will impact intertidal harpacticoid multi-species assemblages are available as yet.

The present study used a mesocosm experiment to assess the potential interactive impacts of different levels of elevated CO<sub>2</sub> and temperature on the fauna from an intertidal zone using the harpacticoid copepod community as a model system to evaluate changes in community structure and species responses.

## Material and methods

The meiofauna samples used in this study are from a mesocosm experiment carried out at Plymouth Marine Laboratory (PML) in 2009 (Hale *et al.*, 2011), where intertidal benthic communities were exposed to elevated temperature crossed with different levels of reduction in the pH of seawater. Sample collection and

mesocosm experimental set-up were described in detail by Hale *et al.* (2011) and are summarized here.

## Material collection

Fifty artificial substrate units (ASU, each one made from four nylon mesh pan scourers tied together, 9 cm ø, 2.5 cm thick) were deployed in a sheltered area of rocky intertidal at Mount Batten, Plymouth, UK (50.3567N, 4.1277W). The area is characterized as a kelp habitat dominated by brown and red algae. The ASUs were attached to the rock between 0.6 and 1 m above lowest chart datum, during the spring low tide on 14 January 2009. They were left for a period of 12 weeks to allow colonization and collected on 8 April 2009. The ASUs were retrieved and transported in plastic bags to the mesocosm facility at the PML 1 h after collection. Once at PML, five ASUs were randomly selected and preserved in 10% formaldehyde solution, to represent the standard invertebrate communities at the start of the exposure period.

## Mesocosm experiment

Forty of the remaining ASUs were each placed individually in separate food grade plastic buckets (vol. 6 l) containing seawater at ambient pH and temperature. Each bucket was randomly allocated to one of the eight treatments (four pH levels crossed with two temperature levels), with five replicates for each combination. Control pH was 8.0 (the ambient seawater pH measured at the fauna collection site), and the decreased pH levels used were 0.3 units below ambient (the predicted drop in ocean pH by 2100), 0.7 units below ambient (the predicted drop in pH by 2250, Caldeira and Wickett, 2003) and a pH of 6.7 (to simulate CO<sub>2</sub> storage site continuous point source leakage under already acidified conditions, Blackford *et al.*, 2009). The mesocosm was held at a control temperature of 12 °C (the ambient temperature measured at the fauna collection site) and the elevated temperature treatment was 4 °C above the control (simulating a rise in temperature midway within the range predicted, 2–6.4 °C, as a result of increased atmospheric CO<sub>2</sub> by 2099 (Sokolov *et al.*, 2009). Buckets containing the ASUs were maintained in water baths (five buckets per water bath) and the artificial manipulation of temperature was achieved and regulated by heaters (Hale *et al.*, 2011).

Seawater was bubbled with CO<sub>2</sub> into the header tanks. Each 6-l bucket was continuously supplied with high pCO<sub>2</sub> seawater (8–10 ml min<sup>-1</sup> using peristaltic pumps) and oxygen was bubbled through the water held within the buckets to assist with maintenance of the correct pH and to increase water mixing and oxygen levels. The monitoring system as described in Hale *et al.* (2011) maintained the nominated pH and temperature treatments throughout the experimental period with little variation (Table 1) and was therefore considered a suitable method for the artificial manipulation of seawater pH and temperature. The natural light regime was approximated using daylight simulation lights within the mesocosm with an average 8-h photoperiod per day. The experiment ran for 60 days, with little variation in the treatment levels (Table 1). During that time, each bucket received 1.68 ml of shellfish feed one time a week to simulate the food availability at the Mount Batten collection site. No tidal simulation was applied during the experiment (Hale *et al.*, 2011).

**Table 1.** Seawater chemistry within a) buckets and b) reservoir tanks during the experimental exposure period (Hale *et al.*, 2011).

|                        | Nominal pH | Temperature (°C) | pH    | Sal     | TCO <sub>2</sub> | TA      | pCO <sub>2</sub> (µatm) | Ω <sub>Ca</sub> | Ω <sub>Ar</sub> | HCO <sub>3</sub> <sup>-</sup> | CO <sub>3</sub> <sup>2-</sup> |       |
|------------------------|------------|------------------|-------|---------|------------------|---------|-------------------------|-----------------|-----------------|-------------------------------|-------------------------------|-------|
| <b>Buckets</b>         |            |                  |       |         |                  |         |                         |                 |                 |                               |                               |       |
| 12 °C                  | 8          | 11.78            | 7.86  | 34.88   | 1858.80          | 1956.61 | 729.23                  | 1.59            | 1.01            | 1784.99                       | 66.59                         |       |
|                        |            | 0.35             | 0.09  | 0.19    | 314.04           | 293.36  | 160.4                   | 0.3             | 0.19            | 275.4                         | 12.5                          |       |
|                        |            | 0.07             | 0.02  | 0.05    | 72.54            | 74.23   | 40.59                   | 0.08            | 0.05            | 69.68                         | 3.16                          |       |
|                        | 7.7        | 11.93            | 7.66  | 34.89   | 2084.49          | 2155.52 | 1295.53                 | 1.17            | 0.75            | 2031.97                       | 49.03                         |       |
|                        |            | 0.35             | 0.08  | 0.24    | 331.50           | 303.58  | 244.51                  | 0.24            | 0.15            | 286.88                        | 10.09                         |       |
|                        |            | 0.07             | 0.01  | 0.06    | 76.57            | 76.81   | 61.87                   | 0.06            | 0.04            | 72.59                         | 2.55                          |       |
|                        | 7.3        | 11.66            | 7.35  | 34.94   | 2181.94          | 2098.44 | 2729.23                 | 0.55            | 0.35            | 2039.57                       | 23.22                         |       |
|                        |            | 0.41             | 0.07  | 0.13    | 227.68           | 228.21  | 499.36                  | 0.11            | 0.07            | 222.75                        | 4.5                           |       |
|                        |            | 0.09             | 0.01  | 0.03    | 52.59            | 57.74   | 126.35                  | 0.03            | 0.02            | 56.36                         | 1.14                          |       |
|                        | 6.7        | 11.53            | 6.81  | 34.82   | 2409.95          | 1942.01 | 2268.73                 | 0.16            | 0.1             | 1925.14                       | 6.6                           |       |
|                        |            | 0.38             | 0.23  | 0.14    | 313.33           | 221.04  | 3127.42                 | 0.11            | 0.07            | 220.99                        | 4.56                          |       |
|                        |            | 0.08             | 0.04  | 0.04    | 72.37            | 55.93   | 791.33                  | 0.03            | 0.02            | 55.92                         | 1.15                          |       |
|                        | 16 °C      | 8                | 16.04 | 7.85    | 35.31            | 1915.97 | 1984.25                 | 822.18          | 1.91            | 1.23                          | 1779.26                       | 80.3  |
|                        |            |                  | 0.40  | 0.13    | 0.26             | 216.12  | 226.77                  | 743.4           | 0.38            | 0.27                          | 204.34                        | 15.83 |
|                        |            |                  | 0.08  | 0.02    | 0.07             | 49.92   | 57.38                   | 188.1           | 0.1             | 0.06                          | 51.7                          | 4.01  |
|                        |            | 7.7              | 16.01 | 7.61    | 35.13            | 2046.30 | 2072.27                 | 1422.98         | 1.21            | 0.78                          | 1943.53                       | 50.94 |
|                        |            |                  | 0.63  | 0.15    | 0.21             | 241.83  | 246.16                  | 388.9           | 0.29            | 0.19                          | 233.63                        | 12.18 |
|                        |            |                  | 0.13  | 0.03    | 0.05             | 55.86   | 62.29                   | 98.4            | 0.07            | 0.05                          | 59.12                         | 3.08  |
| 7.3                    |            | 15.76            | 7.37  | 35.06   | 2105.32          | 2051.74 | 2611.66                 | 0.67            | 0.43            | 1980.85                       | 28.01                         |       |
|                        |            | 0.31             | 0.1   | 0.15    | 254.15           | 232.74  | 547.02                  | 0.15            | 0.1             | 225.48                        | 6.43                          |       |
|                        |            | 0.07             | 0.02  | 0.04    | 58.70            | 58.89   | 138.41                  | 0.04            | 0.02            | 57.05                         | 1.63                          |       |
| 6.7                    |            | 15.48            | 6.66  | 34.99   | 2423.61          | 1957.02 | 3010.36                 | 0.15            | 0.1             | 1940.63                       | 6.5                           |       |
|                        |            | 1.52             | 0.19  | 0.18    | 284.04           | 25.08   | 4141.2                  | 0.08            | 0.05            | 212.54                        | 3.41                          |       |
|                        |            | 0.32             | 0.04  | 0.04    | 65.60            | 54.42   | 1047.85                 | 0.02            | 0.01            | 53.78                         | 0.86                          |       |
| <b>Reservoir tanks</b> |            |                  |       |         |                  |         |                         |                 |                 |                               |                               |       |
| 8                      |            | 8                | 14.08 | 7.89    | 34.95            | 1930    | 2018.97                 | 680.76          | 1.93            | 1.24                          | 1811.93                       | 81.15 |
|                        |            |                  | 0.44  | 0.14    | 0.10             | 273.13  | 307.01                  | 156.68          | 0.31            | 0.2                           | 287.81                        | 12.89 |
|                        |            |                  | 0.19  | 0.06    | 0.05             | 138.22  | 166.89                  | 85.17           | 0.17            | 0.11                          | 156.45                        | 7.01  |
|                        |            | 7.7              | 15.56 | 7.98    | 34.84            | 1860    | 1970.58                 | 527.15          | 2.38            | 1.53                          | 1715.41                       | 99.82 |
|                        |            |                  | 0.41  | 0.14    | 0.13             | 257.68  | 290.3                   | 96.68           | 0.39            | 0.25                          | 231.67                        | 16.49 |
|                        | 0.18       |                  | 0.06  | 0.07    | 130.40           | 157.81  | 52.56                   | 0.21            | 0.14            | 142.08                        | 8.97                          |       |
|                        | 7.3        | 15.46            | 7.68  | 34.82   | 2086.67          | 2116.32 | 1211.65                 | 1.38            | 0.89            | 1970.45                       | 57.92                         |       |
|                        |            | 0.43             | 0.19  | 0.12    | 206.13           | 225.18  | 243.27                  | 0.23            | 0.15            | 216.55                        | 9.6                           |       |
|                        |            | 0.19             | 0.08  | 0.06    | 104.31           | 122.41  | 132.24                  | 0.12            | 0.08            | 117.71                        | 5.22                          |       |
|                        | 6.7        | 14.33            | 7.63  | 34.75   | 2033.33          | 2084.55 | 1308.57                 | 1.21            | 0.77            | 1957.12                       | 50.53                         |       |
|                        |            | 0.56             | 0.18  | 0.15    | 287.90           | 323.71  | 230.09                  | 0.37            | 0.23            | 297.01                        | 15.36                         |       |
|                        |            | 0.24             | 0.08  | 0.08    | 145.70           | 175.97  | 125.07                  | 0.2             | 0.13            | 161.46                        | 8.35                          |       |
|                        | 7.3        | 15.39            | 7.26  | 34.86   | 2156.67          | 2066.85 | 3279.5                  | 0.54            | 0.35            | 2010.12                       | 22.48                         |       |
|                        |            | 0.55             | 0.19  | 0.13    | 130.21           | 141.82  | 584.35                  | 0.12            | 0.08            | 135.28                        | 5.21                          |       |
|                        |            | 0.24             | 0.08  | 0.07    | 65.90            | 77.09   | 317.65                  | 0.07            | 0.04            | 73.54                         | 2.83                          |       |
|                        | 6.7        | 14.26            | 7.35  | 34.82   | 2106.67          | 2043.55 | 2905.94                 | 0.55            | 0.35            | 1984.88                       | 23.14                         |       |
|                        |            | 0.43             | 0.2   | 0.14    | 264.49           | 286.94  | 484.55                  | 0.12            | 0.08            | 278.31                        | 5.16                          |       |
|                        |            | 0.19             | 0.08  | 0.07    | 133.85           | 155.98  | 263.4                   | 0.07            | 0.04            | 151.29                        | 2.8                           |       |
| 6.7                    | 13.86      | 6.33             | 34.76 | 2686.67 | 1770.66          | 243.69  | 0.05                    | 0.03            | 1765.47         | 2.16                          |                               |       |
|                        | 0.44       | 0.14             | 0.14  | 311.7   | 247              | 42.29   | 0.02                    | 0.01            | 245.84          | 0.64                          |                               |       |
|                        | 0.19       | 0.06             | 0.08  | 157.74  | 134.27           | 22.99   | 0.01                    | 0.01            | 133.64          | 0.35                          |                               |       |
| 6.7                    | 15.3       | 6.34             | 34.76 | 2693.33 | 1763.27          | 238.83  | 0.06                    | 0.04            | 1757.66         | 2.31                          |                               |       |
|                        | 0.7        | 0.2              | 0.16  | 358.17  | 220.64           | 41.23   | 0.02                    | 0.01            | 219.47          | 0.63                          |                               |       |
|                        | 0.3        | 0.08             | 0.09  | 181.26  | 119.94           | 22.41   | 0.01                    | 0.01            | 119.31          | 0.34                          |                               |       |

Values: mean, ±SD, 95% CI.

Sal, salinity; TCO<sub>2</sub>, total water carbon dioxide concentration; TA, total alkalinity; pCO<sub>2</sub>, partial pressure of carbon dioxide; Ω<sub>Ca</sub>, calcite saturation state; Ω<sub>Ar</sub>, aragonite saturation state; HCO<sub>3</sub><sup>-</sup>, bicarbonate concentration; CO<sub>3</sub><sup>2-</sup>, carbonate concentration.

At the end of the exposure period, the ASUs were removed from the buckets and the resident fauna were extracted. The collected material was passed through two sieves (0.5 mm and 63 µm) to separate the macrofauna fraction from the meiofauna fraction (Sommerfield *et al.*, 2007). Results from the macrofauna fraction are published in Hale *et al.* (2011) and meiofauna (major taxonomic groups) and Nematoda community results have been

published in Meadows *et al.* (2015). Owing to the high number of meiofauna organisms in each sample, 36 samples (the 4 first replicates per treatment + 4 initial samples; instead of 5) were selected for copepod species identification. Under a stereo microscope, the first 60 copepod individuals were selected from each replicate, placed in Eppendorf tubes and preserved in 75% Industrial Methylated Spirit (IMS). The identification of

Copepoda Harpacticoida (copepodite V and adult stages) was done under a compound microscope (1000× magnification) and identified to species by the analyses of the entire animal following the taxonomic keys of Lang (1948, 1965), Huys *et al.* (1996), and Wells (2007) as well as publications with specific descriptions.

### Statistical analysis

Permutational multivariate analysis of variance (PERMANOVA) (McArdle and Anderson, 2001), based on Bray–Curtis dissimilarities of copepod abundance  $\log_{(x+1)}$  transformed data, was used to evaluate the impact of different temperatures (factor Temperature) and pH levels (factor pH) on the community structure. For all analyses, 9999 random permutations were used. Pairwise *a posteriori* comparisons (the multivariate version of the *t* statistic) were made for the calculation of significant differences. A similarity percentage (SIMPER) analysis was applied to determine which species were responsible for the dissimilarities among pH and temperatures. The Shannon–Wiener ( $H'$ , using  $\log_2$ ), Pielou's evenness ( $J'$ ), and the number of species in each sample ( $S$ ) were calculated. The population parameters malformed animal ratio, copepodite ratio, ovigerous female, and female/male ratios were also calculated. In the present study, malformations were considered as external morphological abnormalities in important taxonomic characteristics, i.e., when parts of the body do not have the normal or expected shape for a given species (e.g. the number and shape of limbs or thorns). Minor variations in ornamentation were not considered malformations.

Two-way analysis of variance (ANOVA) was used to examine the effects of the different pH and temperatures on the densities of harpacticoid's more abundant species (>2% of total), on the ecological descriptors ( $S$ ,  $J'$ , and  $H'$ ) and on population parameters (ratios of copepodites, female/male, ovigerous females, and malformed animals).

PERMANOVA, SIMPER, and Non-metric Multi-Dimensional Scaling (MDS) were applied using the software Primer<sup>®</sup> 6 with add-on PERMANOVA+ (Plymouth Routines in Multivariate Ecological Researches). The two-way ANOVAs were calculated using the software STATISTICA 12. Distribution normality and homogeneity of variance were checked. The level of significance was set at  $p < 0.05$  for all analyses. Confidence intervals of 95% (CI) were used to express the variation of the calculated means. Parametric statistical analysis followed Zar (1996).

### Results

A total of 2160 copepod individuals were analysed, 60.09% of which were identified as harpacticoids at the species level, 0.79% were adult cyclopoids, 38.7% were copepodites (total), and 0.42% were broken animals that could not be identified to species level. Among the harpacticoids, 12 families, 33 genera, and 51 species were recorded (Table 2).

*Tisbe* sp. (37.42%), *Harpacticus obscurus* (11.91%), *Ectinosoma* sp2 (5.45%), *Ectinosoma* sp1 (4.8%), *Amphiascoides* sp1 (4.55%), *Paradactylopodia* sp. (4.49%), *Dactylopusia vulgaris dissimilis* (4.26%), *Ameiropsis mixta* (3.94%), *Amphiascus longarticulatus* (3.25%), *Amphiascoides golikovi* (3.06%), and *Ameira* sp. (1.67%), accounted for ~85% of total.

MDS ordination analyses indicated marked differences in the structure of copepod community among field and treatment samples. Among treatments, the most important difference was

observed between samples maintained at pH 6.7 and those from the other pH treatments (Figure 1).

The pattern illustrated in the MDS ordination (Figure 1) was confirmed by PERMANOVA. Significant differences in the copepod community structures were detected for the factor pH and Temperature, but not for the interaction between the two factors (Table 3).

The pattern of response of copepod community structure to the different pH levels was mainly caused by differences among samples kept at pH 6.7, whereas no differences were detected among control and the other treatments (Table 4).

SIMPER analyses showed that decreases in the density of *Ectinosoma* sp2 and *Tisbe* sp. in samples at pH 6.7 were important to dissimilarities among treatments (Table 5).

SIMPER analyses showed that many species were important contributors to the dissimilarity between communities kept at the two different temperature levels (Table 6).

ANOVA results for species richness, evenness, and diversity showed no significant differences for the factors pH and temperature nor for interaction between the two factors ( $P > 0.1$  for all) (Figure 2).

ANOVA results for copepod population parameters showed no differences for female/male ratio ( $P > 0.6$  for all comparisons) nor for the percentage of ovigerous females ( $P > 0.15$  for all comparisons) for both pH and temperature or interaction between factors. The copepodite ratio showed significant differences for the factor pH [ $F_{(3,24)} = 3.12$ ;  $p = 0.045$ ] and for the factor Temperature [ $F_{(1,24)} = 5.41$ ;  $p = 0.029$ ], but not for their interaction ( $p > 0.18$ ). The *a posteriori* Fisher test indicated that copepodite ratio at pH 6.7 was lower than at pH 7.7 ( $p = 0.007$ ) and higher at 16°C compared with 12°C. Malformed animals ratio showed significant differences for factor pH [ $F_{(3,24)} = 3.24$ ;  $p = 0.039$ ]. The Fisher test indicated that the ratio of malformed animals at pH 6.7 was significantly higher when compared with pH 8.0 ( $p = 0.014$ ), 7.7 ( $p = 0.013$ ) and 7.3 ( $p = 0.041$ ) (Figure 3).

Only few harpacticoid species showed significant differences among treatments, and the majority were sensitive only to pH 6.7 (Figure 4). The two-way ANOVA indicated that *Tisbe* sp. showed significant interaction between the factors pH and Temperature [ $F_{(3,24)} = 5.22$ ,  $p < 0.01$ ]. At pH 6.7, *Tisbe* sp. showed higher densities at 12°C than at 16°C ( $p < 0.001$ ). Moreover, the density of *Tisbe* sp. in samples held at pH 6.7 and 16°C was lower than in the all other treatments ( $p < 0.001$ ). *Ectinosoma* sp2 was sensitive to the pH [ $F_{(3,24)} = 6.99$ ,  $p < 0.01$ ] and Temperature [ $F_{(1,24)} = 5.33$ ,  $p = 0.03$ ] changes, but the interaction was not significant [ $F_{(3,24)} = 0.44$ ,  $p = 0.72$ ]. Results of the *a posteriori* test showed that the density of *Ectinosoma* sp2 was lower at pH 6.7 when compared with all other pH levels ( $p < 0.01$  for all comparisons). Considering the factor temperature, *Ectinosoma* sp2 density was higher at 16°C than at 12°C ( $p = 0.03$ ). The species *Amphiascoides* sp1 showed significant differences only for the factor Temperature [ $F_{(1,24)} = 5.11$ ,  $p = 0.033$ ], with higher densities found at 16°C.

### Discussion

The results presented here indicate the potential impacts to intertidal copepods that are likely to occur across a range of predicted pH (in the context of global change at highly variable coastal areas and CO<sub>2</sub> storage leakage) and temperature levels (Caldeira and Wickett, 2003; IPCC, 2014). As ocean acidification and warming are the two major consequences that have already been

**Table 2.** List of Copepoda *Harpacticoida* species from collected at the rocky shore at Mount Batten, Plymouth, UK.

| Order Harpacticoida Sars, 1903                            |  |
|-----------------------------------------------------------|--|
| <b>Suborder Oligoarthra Lang, 1944</b>                    |  |
| <b>Family Laophontidae T. Scott, 1905</b>                 |  |
| <i>Laophonte cornuta</i> Philippi, 1840                   |  |
| <i>Laophonte setosa</i> Boeck, 1865                       |  |
| <i>Laophonte sima</i> Gurney, 1927                        |  |
| <i>Laophonte</i> sp                                       |  |
| <i>Laophontinae</i> sp1                                   |  |
| <i>Laophontinae</i> sp2                                   |  |
| <i>Paralaophonte brevisstris</i> (Claus, 1863)            |  |
| <b>Family Miraciidae Dana, 1846</b>                       |  |
| <i>Amonardia normani</i> (Brady, 1872)                    |  |
| <i>Amphiascoides golikovi</i> Chislenko, 1977             |  |
| <i>Amphiascoides</i> sp1                                  |  |
| <i>Amphiascopsis</i> sp                                   |  |
| <i>Amphiascus minutus</i> (Claus, 1863)                   |  |
| <i>Amphiascus longarticulatus</i> Marcus, 1974            |  |
| <i>Amphiascus</i> (varians) sp                            |  |
| <i>Amphiascus parvus</i> Sars, 1906                       |  |
| <i>Amphiascus angustipes</i> Gurney, 1927                 |  |
| <i>Bulbamphiascus</i> sp                                  |  |
| <i>Delavalia</i> sp                                       |  |
| <i>Haloshizopera lima</i> Becker, 1974                    |  |
| <i>Paramphiascella</i> sp                                 |  |
| <i>Robertgurneya</i> sp                                   |  |
| <i>Robersonia</i> sp                                      |  |
| <b>Family Ameiridae Boeck, 1865</b>                       |  |
| <i>Ameira</i> sp                                          |  |
| <i>Ameiropsis mixta</i> Sars, 1907                        |  |
| <i>Nitocra</i> sp                                         |  |
| <i>Proameira hiddensoensis</i> (Schäfer, 1936)            |  |
| <i>Proameira thetiensis</i> Pallares, 1982                |  |
| <i>Psyllocamptus</i> (L) <i>triarticulatus</i> Lang, 1965 |  |
| <b>Family Canthocamptidae Brady, 1880</b>                 |  |
| <i>Mesochra pygmaea</i> (Claus, 1863)                     |  |
| <i>Nannomesochra arupinensis</i> (Brian, 1925)            |  |
| <b>Family Dactylopusiidae Lang, 1936</b>                  |  |
| <i>Dactylopusia vulgaris dissimilis</i> Brian, 1921       |  |
| <i>Diarthrodes</i> sp                                     |  |
| <i>Paradactylopodia</i> sp                                |  |
| <b>Family Ectinosomatidae Sars, 1903</b>                  |  |
| Ectinosomatidae sp1.                                      |  |
| <i>Ectinosoma</i> sp1.                                    |  |
| <i>Ectinosoma</i> sp2.                                    |  |
| <i>Halectinosoma</i> sp1.                                 |  |
| <i>Halectinosoma</i> sp2.                                 |  |
| <i>Halectinosoma</i> sp3.                                 |  |
| <i>Pseudobradya</i> sp1.                                  |  |
| <i>Pseudobradya</i> sp2.                                  |  |
| <i>Pseudobradya</i> sp3.                                  |  |
| <i>Sigmatidium</i> sp.                                    |  |
| <b>Family Longipediidae Boeck, 1865</b>                   |  |
| <i>Longipedia</i> sp.                                     |  |
| <b>Family Normanellidae Lang, 1944</b>                    |  |
| <i>Normanella</i> sp.                                     |  |
| <b>Family Harpacticidae Dana, 1846</b>                    |  |
| <i>Harpacticus obscurus</i> T. Scott, 1895                |  |
| <b>Family Pseudotachidiidae Lang, 1936</b>                |  |
| <i>Idomene purpurocincta</i> (Norman & T. Scott, 1905)    |  |
| <b>Family Peltidiidae Claus, 1860</b>                     |  |
| <i>Alteutha depressa</i> (Baird, 1837)                    |  |
| <i>Eupelte</i> sp.                                        |  |
| <b>Family Tisbidae Stebbing, 1910</b>                     |  |
| <i>Tisbe</i> sp.                                          |  |
| <i>Harpacticoida</i> sp.                                  |  |

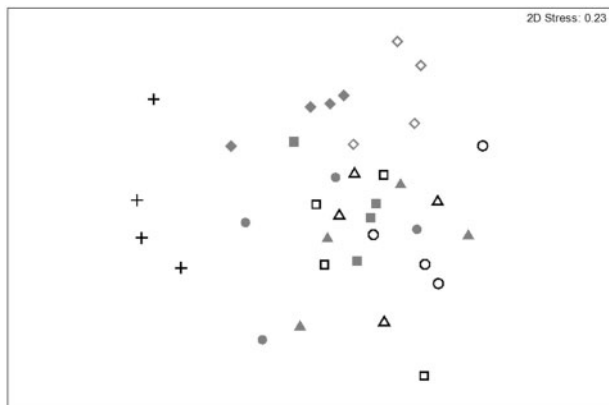

**Figure 1.** MDS ordination plots for the Bray–Curtis similarity for Copepod community structure. + (cross) Field samples, • (circle) 8.0, ▲ (triangle) 7.7, ■ (square) 7.3, ◆ (diamond) 6.7 (12 °C closed symbols, 16 °C open symbols).

observed in response to increased atmospheric CO<sub>2</sub>, organisms are being exposed to these stressors simultaneously in natural ecosystems (Byrne, 2011; Hale *et al.*, 2011; Melatunan *et al.*, 2013). In the present study, harpacticoid community structure was affected by pH and temperature separately, with samples

**Table 3.** PERMANOVA results for the Copepod community exposed to different pH and temperatures.

| Source          | Df | MS     | F           | P      |
|-----------------|----|--------|-------------|--------|
| Temperature (T) | 1  | 3584.5 | <b>2.52</b> | 0.0044 |
| pH              | 3  | 3147.1 | <b>2.22</b> | 0.0004 |
| pH × T          | 3  | 1467.1 | 1.03        | 0.422  |
| Residual        | 24 | 1420.3 |             |        |

Significant values are highlighted in bold.

**Table 4.** Pair-wise *a posteriori* comparisons for pH.

| pH comparisons | t            | P      |
|----------------|--------------|--------|
| 8.0 × 7.7      | 0.821        | 0.759  |
| 7.7 × 7.3      | 1.000        | 0.466  |
| 7.7 × 6.7      | <b>1.951</b> | 0.0001 |
| 8.0 × 7.3      | 0.911        | 0.6551 |
| 8.0 × 6.7      | <b>2.066</b> | 0.0001 |
| 7.3 × 6.7      | <b>1.839</b> | 0.0002 |

Significant values are highlighted in bold.

exposed to pH 6.7 showing the strongest effect. Using the same experimental procedures, Meadows *et al.* (2015) found that the total density of copepods was significantly affected by pH and temperature separately, and that copepod abundance at pH 6.7

**Table 5.** Percent contribution (Contrib. %) of Cyclopoida and species of *Harpacticoida* to average dissimilarity (Diss.) among different pH (Cut off for low contributions: 70%).

| 8.0 vs 6.7                              |           | 7.7 vs 6.7                              |           | 7.3 vs 6.7                              |           |
|-----------------------------------------|-----------|-----------------------------------------|-----------|-----------------------------------------|-----------|
| Diss.= 63.88                            | Contrib.% | Diss.= 60.36                            | Contrib.% | Diss.= 58.61                            | Contrib.% |
| <i>Amphiascus longarticulatus</i>       | 5.84      | <i>Ectinosoma</i> sp2                   | 6.63      | <i>Ectinosoma</i> sp2                   | 6.18      |
| <i>Tisbe</i> sp.                        | 5.80      | <i>Tisbe</i> sp                         | 6.45      | <i>Tisbe</i> sp                         | 6.02      |
| <i>Ectinosoma</i> sp2.                  | 5.62      | <i>Amphiascoides golikovi</i>           | 5.40      | <i>Paradactylopodia</i> sp              | 5.51      |
| <i>Dactylopusia vulgaris dissimilis</i> | 5.04      | <i>Amphiascoides</i> sp1                | 4.89      | <i>Amphiascus longarticulatus</i>       | 5.31      |
| <i>Amphiascoides golikovi</i>           | 4.81      | <i>Delavalia</i> sp                     | 4.85      | <i>Amphiascoides</i> sp1                | 4.66      |
| <i>Laophonte cornuta</i>                | 4.65      | <i>Amphiascus longarticulatus</i>       | 4.82      | <i>Laophonte cornuta</i>                | 4.44      |
| <i>Amphiascoides</i> sp1.               | 4.65      | <i>Laophonte cornuta</i>                | 4.70      | <i>Robertgurneya</i> sp                 | 4.01      |
| <i>Paradactylopodia</i> sp.             | 4.54      | <i>Ameiropsis mixta</i>                 | 4.44      | <i>Ameiropsis mixta</i>                 | 3.68      |
| <i>Normanella</i> sp.                   | 4.09      | <i>Paradactylopodia</i> sp              | 4.32      | <i>Pseudobradya</i> sp2                 | 3.67      |
| <i>Ectinosoma</i> sp1.                  | 4.07      | Cyclopoida                              | 4.23      | <i>Ectinosoma</i> sp1                   | 3.58      |
| <i>Ameira</i> sp.                       | 4.01      | <i>Dactylopusia vulgaris dissimilis</i> | 4.14      | <i>Dactylopusia vulgaris dissimilis</i> | 3.54      |
| Cyclopoida                              | 3.76      | <i>Ectinosoma</i> sp1                   | 4.01      | <i>Amphiascoides golikovi</i>           | 3.52      |
| <i>Ameiropsis mixta</i>                 | 3.22      | <i>Normanella</i> sp                    | 3.69      | <i>Pseudobradya</i> sp1                 | 3.25      |
| <i>Pseudobradya</i> sp1.                | 2.88      | <i>Idomene purpurocincta</i>            | 3.39      | <i>Idomene purpurocincta</i>            | 3.18      |
| <i>Pseudobradya</i> sp2.                | 2.86      | <i>Pseudobradya</i> sp1                 | 3.35      | <i>Ameira</i> sp                        | 3.17      |
| <i>Laophonte sima</i>                   | 2.84      |                                         |           | <i>Normanella</i> sp                    | 2.82      |
|                                         |           |                                         |           | <i>Laophontinae</i> sp2                 | 2.53      |

**Table 6.** Percent contribution (Contrib. %) of Cyclopoida and species of *Harpacticoida* to average dissimilarity (Diss.) between temperatures (Cut off for low contributions: 70%).

| 12 vs 16°C                              |           |
|-----------------------------------------|-----------|
| Diss.= 57.39                            | Contrib.% |
| <i>Amphiascoides</i> sp1.               | 5.18      |
| <i>Paradactylopodia</i> sp.             | 4.98      |
| <i>Amphiascus longarticulatus</i>       | 4.81      |
| <i>Ectinosoma</i> sp.                   | 4.68      |
| <i>Amphiascoides golikovi</i>           | 4.38      |
| <i>Dactylopusia vulgaris dissimilis</i> | 4.25      |
| Cyclopoida                              | 4.11      |
| <i>Tisbe</i> sp                         | 4.11      |
| <i>Ameiropsis mixta</i>                 | 4.06      |
| <i>Ectinosoma</i> sp1.                  | 3.83      |
| <i>Laophonte cornuta</i>                | 3.81      |
| <i>Normanella</i> sp.                   | 3.72      |
| <i>Ameira</i> sp.                       | 3.68      |
| <i>Pseudobradya</i> sp1.                | 3.42      |
| <i>Delavalia</i> sp.                    | 3.38      |
| <i>Robertgurneya</i> sp.                | 3.15      |
| <i>Idomene purpurocincta</i>            | 2.93      |

was significantly lower compared with other pH levels (Meadows *et al.*, 2015). However, the here presented detailed analysis at lower taxonomic level showed that different harpacticoid species exhibited divergent response patterns highlighting the species-specific nature of responding to stressors.

The direct effects on taxa and the indirect effects through ecological interactions are both important factors influencing the response of a multispecies intertidal community to increasing pCO<sub>2</sub> and warming (Hale *et al.*, 2011; Melatunan *et al.*, 2013). Species interactions may attenuate or amplify the direct effects on individual species (Kroeker *et al.*, 2012). In the present study, harpacticoid species responded mainly to treatments held at pH 6.7. Differences between pH 6.7 and the other pH treatments

were caused by important reductions in the densities of *Tisbe* sp. and *Ectinosoma* sp2, followed by a considerable increase in the densities of *A. longarticulatus* and *A. golikovi* at pH 6.7. These changes were also accompanied by differential species response to temperature at this pH, where the densities of *A. longarticulatus* and of *Amphiascoides* sp1 were higher at 16°C and the density of *Tisbe* sp. was higher at 12°C. These results show that in multispecies communities it is likely that certain trade-offs between species will occur under environmental change, with both species that suffer and benefit from the changing conditions altering the resulting communities.

Most of the studies investigating the effects of increased pCO<sub>2</sub> on copepods have found that acidification associated with a wide range of CO<sub>2</sub> concentrations predicted for this century cause no significant effects on mortality, development, metabolism, or reproductive parameters (Mayor *et al.*, 2012; McConville *et al.*, 2013; Vehmaa *et al.*, 2013; Hildebrandt *et al.*, 2014; Li *et al.*, 2015). However, when copepods are exposed to a range of pCO<sub>2</sub> predicted for a future ocean in combination with increasing temperatures they become more sensitive to high pCO<sub>2</sub> with impacts on offspring viability, hatching success, egg production, and metabolic rates (Mayor *et al.*, 2012; Vehmaa *et al.*, 2013; Hildebrandt *et al.*, 2014; Zervoudaki *et al.*, 2014).

Some studies have applied CO<sub>2</sub> concentrations far beyond those expected for the next 100 years as reported by the IPCC reports. However, such predictions are for open ocean conditions and coastal environments already experiencing pCO<sub>2</sub> levels much higher than those predicted under future open ocean scenarios (Blackford *et al.*, 2009; Hofmann *et al.*, 2011). Consequently, these higher treatment levels can still be considered as relevant to future ocean acidification impacts in highly variable inshore systems. At these levels (5000–10,000 ppm CO<sub>2</sub>, pH 7.02–6.7), copepods were negatively affected in terms of reproduction but not in terms of mortality, with reductions in hatching success and egg production and with increases in hatching and nauplius mortality (Kurihara *et al.*, 2004a, b; Mayor *et al.*, 2007; McConville *et al.*, 2013).

Contrarily to what was observed for single-species experiments, in the present study, the copepod communities were negatively affected in terms of mortality at these high pCO<sub>2</sub> levels. Under these conditions, the response patterns were complex.

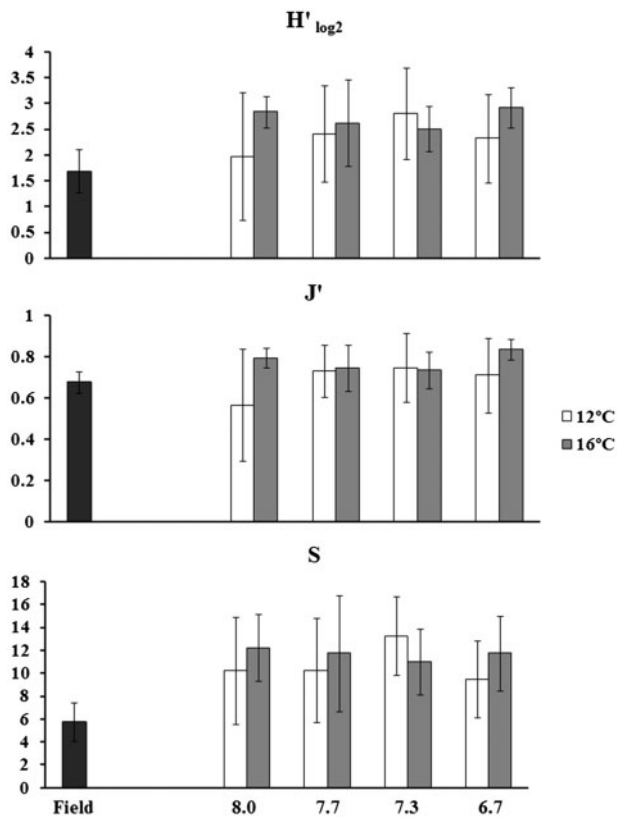

**Figure 2.** Shannon diversity ( $H' \log_2$ ), Pielou's evenness ( $J'$ ) and species richness ( $S$ ) for copepod community at different pH and temperatures. Values: mean  $\pm$  95% confidence intervals.

Despite the sensitivity of the dominant species *Tisbe* sp, the densities of other species increased, suggesting that the impact of increased pCO<sub>2</sub> in combination with warming can cause responses that are not predictably unidirectional. Our results confirm the increasing consensus in literature that experiments on whole assemblages should be prioritized performed alongside species and population specific studies. The former can reveal complex changes in ecological and biological interactions and present an ecosystem-level view of changes, whilst the latter may provide the necessary information on physiology and ecology of species and population to interpret a more complex system with many ecological interactions. This way, results and predictions from single species studies can be interpreted in the light of multi-specific assemblages (e.g. Kroeker *et al.*, 2013; Gaylord *et al.*, 2015).

In the present study, strong impacts were observed only at the most severe pH treatment, and copepods were not affected at less severe pH reductions. This apparent high tolerance is to be expected considering that communities from temperate intertidal environments experience high variability of abiotic factors in their natural environment and thus, most intertidal animals would have developed effective physiological adaptations for surviving such a highly variable and testing environment. In fact, there have been studies that found no effects of high pCO<sub>2</sub> (pH between 7.78 and 7.2) on copepods from the Arctic or temperate environments and/or from laboratory cultures (Mayor *et al.*, 2012; McConville *et al.*, 2013; Vehmaa *et al.*, 2013; Hildebrandt *et al.*, 2014; Li *et al.*, 2015). It is expected that fauna from habitats characterized by strong abiotic variability (e.g. areas with volcanic emissions in the sea, areas with excessive respiration in confined areas filled with plant and animal life, like rockpools of the intertidal zone, marine sediments, or hypoxic bottom waters) would exhibit greater tolerance to climate change predictions expected for this century (Pörtner *et al.*, 2004). Pascal *et al.* (2010) suggested that among two harpacticoid species, the species (*Shizopera knabeni*) that came from environments that are more

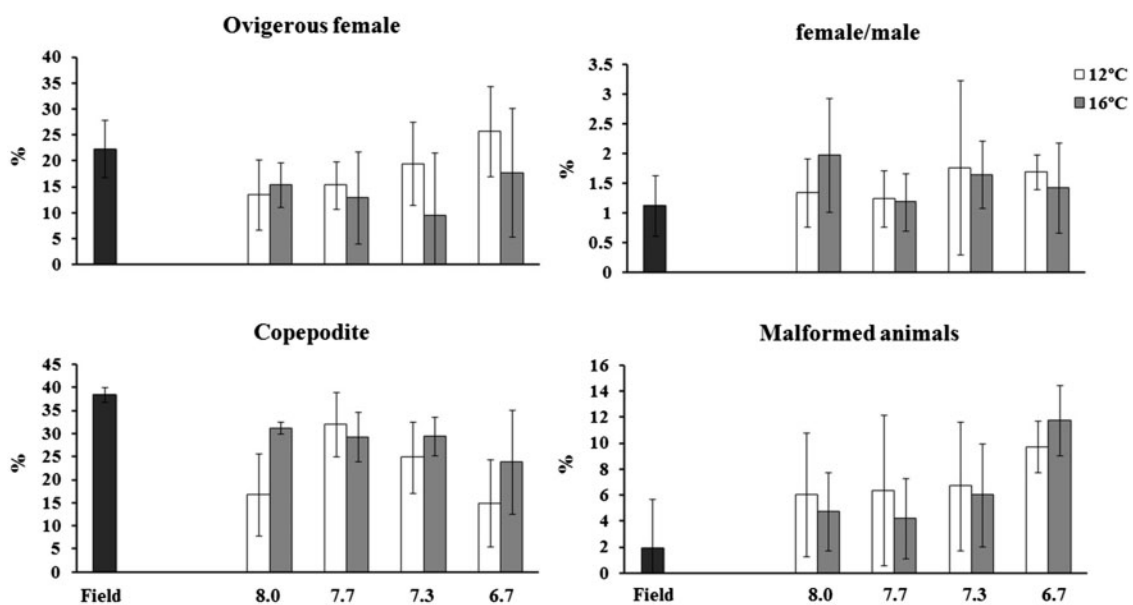

**Figure 3.** Mean ( $\pm$ 95% confidence intervals) of ovigerous female, female/male ratios, copepodite, and malformed animals' ratios at different pH and temperatures.

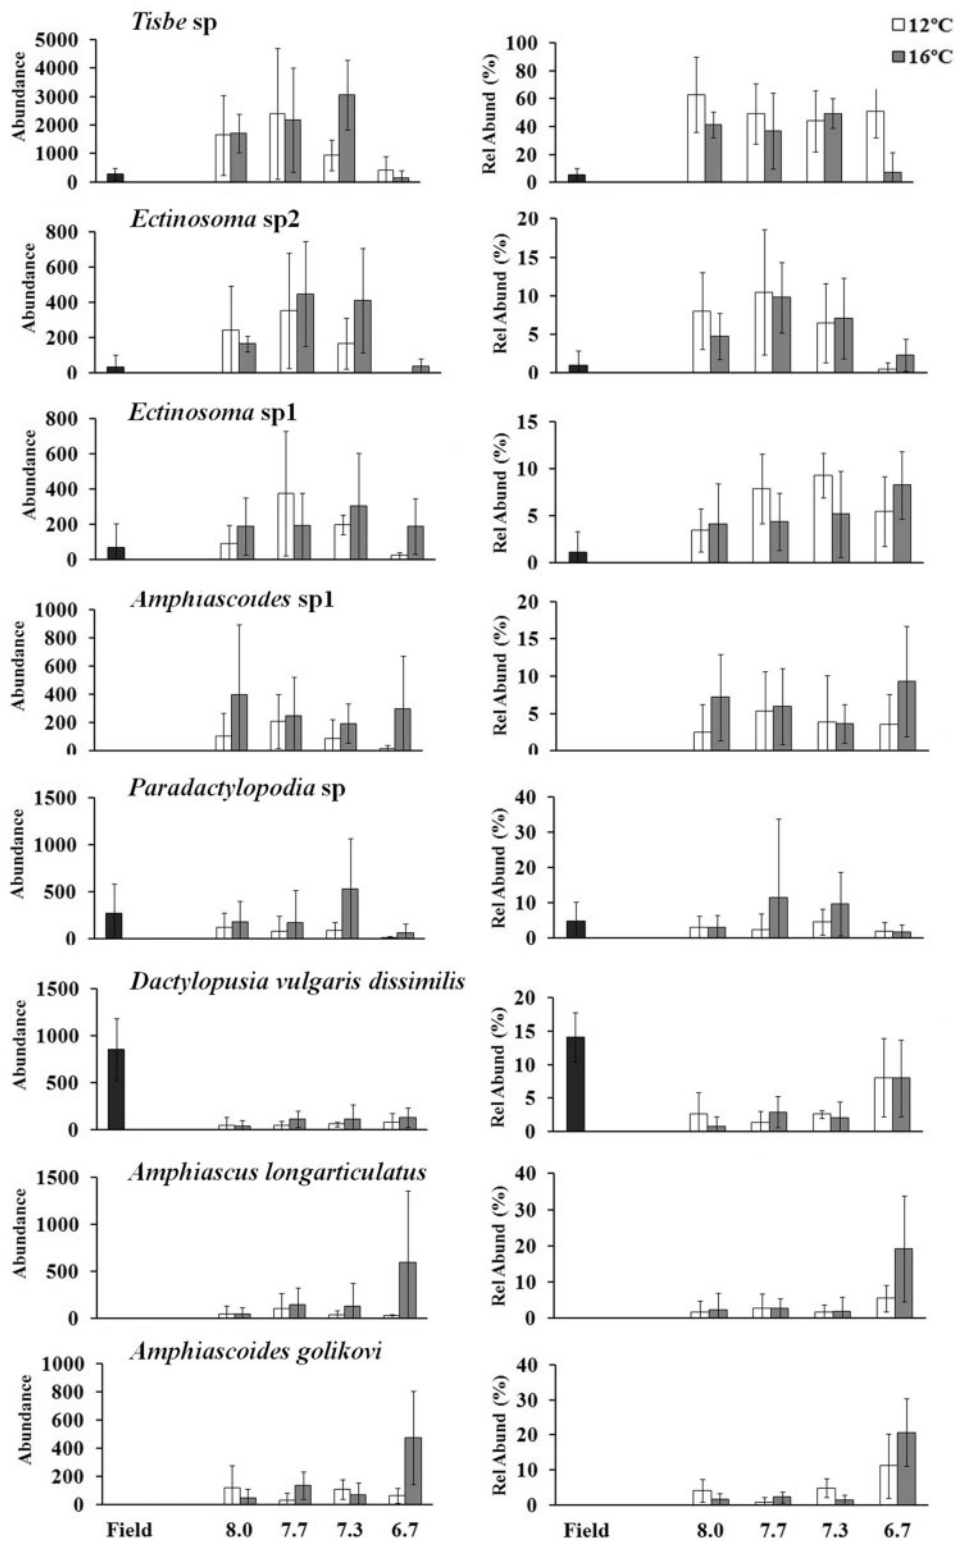

**Figure 4.** The effects of pH and temperature on the mean abundance and relative abundance ( $\pm 95\%$  confidence intervals) of the main harpacticoids species.



prone to hypercapnia (e.g. mudflats) was less sensitive to future acidification than *Amphiascoides stopus*, which is found on large grained beaches. Li *et al.* (2015) found that the combination of heat shock and high pCO<sub>2</sub> did not affect the mortality of *Tigriopus japonicus*, a harpacticoid copepod which inhabits a highly variable intertidal environment. However, when exposed to very high CO<sub>2</sub> levels, reduction in egg production rate and hatching success was observed for *Centropages typicus*, but not for *Temora longicornis* (both calanoid copepods). As both species were collected from the western English Channel the results suggest that even species from the same locality and with similar life histories could present different tolerances to ocean acidification (McConville *et al.*, 2013). Additionally, alternative theories suggest that for some of the organisms, particularly if they are from populations at the edges of their geographical distribution, individuals may already be close to their upper tolerance capacity and even a slight increase in pCO<sub>2</sub> could have significant impacts on community structure (Findlay *et al.*, 2010).

*Tisbe* sp. was the dominant species and the general community response to increased pCO<sub>2</sub> and warming observed was influenced by this species. Species of this genera are characterized by having high fecundity and a short generation time (7–16 days, Williams and Jones, 1994; Pinto *et al.*, 2001), a wide range of body sizes, tolerance to a wide range of environmental changes and by having the ability to grow on different food sources and attaining high-population densities (e.g. 205 ind. mL<sup>-1</sup>) (Souza-Santos *et al.*, 2006), characteristics that allows *Tisbe* species to be easily reared in the laboratory (e.g. Williams and Jones, 1999; Souza-Santos *et al.*, 2015). However, despite the absence of significant effects on *Tisbe* sp. density at pH 7.7 and 7.3, it is possible—if not likely—that sub-lethal impacts could occur (Fitzer *et al.*, 2012).

In the present study, the positive increase of malformed adult animals with the increased level of warming and pCO<sub>2</sub> is presented for the first time for copepods. This kind of approach has been conducted only for large representatives of macrobenthic species at early development stages. For those animals, an increase in abnormal development in larval and juveniles stages of some coral, molluscs and echinoderms has been correlated to increases in pCO<sub>2</sub> and warming (Byrne, 2011). Since the time difference between the nauplii stage and the last copepodite stage is very short (10 and 18 days) for most of harpacticoid species (Giere, 2009), the evaluation of abnormality at these stages would be a very difficult task, and for studies at community level almost impossible. On the other hand, assessing the presence of malformed appendices in adults during microscope identification does not increase time significantly. The analysis of this parameter indicates that, species that do not suffer mortality in response to high pCO<sub>2</sub> and warming entering the adult stage (like *Tisbe* sp) are not free from sub-lethal symptoms that could have negative consequences for populations after long periods of exposure.

The exposure period of 60 days could be a brief time scale to detect subtle effects for other communities such as macrofauna (Hale *et al.*, 2011). However, owing to the rapid life cycles of harpacticoid copepods, the present results were most probably the response of a natural community exposed to elevated pCO<sub>2</sub> and warming over 6–8 generations (Giere, 2009). A limitation of the present study is the exposure of intertidal communities to artificially constant low pH. Consequently, high priorities for future research should consider the natural variability of pH and temperature that organisms are subjected in field in order to

investigate climate change effects on species and community responses through natural and manipulative experiments.

The results presented in this study demonstrated that the combination of elevated levels of CO<sub>2</sub> and ocean warming may have substantial effects on harpacticoid communities from intertidal environments. Moreover, they showed that ecological interactions may lead to complex community responses to pH and temperature changes that cannot be encompassed by single species and/or single stressor experiments.

## Acknowledgments

V.C.S. gratefully acknowledges a PhD scholarship from the Coordenação de Aperfeiçoamento de Pessoal de Nível Superior (CAPES) and Fundação de Amparo à Ciência e Tecnologia do Estado de Pernambuco (FACEPE), P.J.P.S. acknowledges research fellowship (CNPq 306444/2014-3) from the Conselho Nacional de Ciência e Tecnologia (CNPq). J.I. was supported by a Plymouth Marine Laboratory Post-doctoral Research Fellowship in collaboration with University of Exeter and a Marie Curie Intra-European Fellowship within the 7th European Commission Framework Programme (Grant Agreement FP7-PEOPLE-2011-IEF no. 00879). The initial study was undertaken while R.H. was in receipt of a NERC Advanced Course Studentship. Thanks are also owing to anonymous referees for providing comments that improved the manuscript.

## References

- Blackford, J., Jones, N., Proctor, R., Holt, J., Widdicombe, S., Lowe, D., and Rees, A. 2009. An initial assessment of the potential environmental impact of CO<sub>2</sub> escape from marine carbon capture and storage systems. Proceedings of the Institution of Mechanical Engineers, Part A: Journal of Power and Energy, 223: 269–280.
- Byrne, M. 2011. Impact of ocean warming and ocean acidification on marine invertebrate life history stages: vulnerabilities and potential for persistence in a changing ocean. Oceanography and Marine Biology: An Annual Review, 49: 1–42.
- Caldeira, K., and Wickett, M. E. 2003. Anthropogenic carbon and ocean pH. Nature, 425: 365–365.
- Costa, A. B. H. P., Valença, A. P. M. C., and Santos, P. J. P. 2016. Is meiofauna community structure in Artificial Substrate Units a good tool to assess anthropogenic impact in estuaries? Marine Pollution Bulletin, 110: 354–361.
- Doney, S. C., Balch, W. M., Fabry, V. J., and Feely, R. A. 2009. Ocean acidification: a critical emerging problem for the ocean sciences. Oceanography, 22: 16–25.
- Feely, R. A., Doney, S. C., and Cooley, S. R. 2009. Ocean acidification: present conditions and future changes in a high-CO<sub>2</sub> world. Oceanography, 22: 36–47.
- Findlay, H. S., Kendall, M. A., Spicer, J. I., and Widdicombe, S. 2010. Post-larval development of two intertidal barnacles at elevated CO<sub>2</sub> and temperature. Marine Biology, 157: 725–735.
- Fitzer, S. C., Caldwell, G. S., Close, A. J., Clare, A. S., Upstill-Goddard, R. C., and Bentley, M. G. 2012. Ocean acidification induces multi-generational decline in copepod naupliar production with possible conflict for reproductive resource allocation. Journal of Experimental Marine Biology and Ecology, 418–419: 30–36.
- Folt, C. L., Chen, C. Y., Moore, M. V., and Burnaford, J. 1999. Synergism and antagonism among multiple stressors. Limnology and Oceanography, 44: 864–877.
- Gaylord, B., Kroeker, K. J., Sunday, J. M., Anderson, K. M., Barry, J. P., Brown, N. E., Connell, S. D., *et al.* 2015. Ocean acidification through the lens of ecological theory. Ecology, 96: 3–15.

- Giere, O. 2009. *Meiobenthology: The Microscopic Motile Fauna of Aquatic Sediments*, 2nd edn. Springer, Berlin. 527 pp.
- Hale, R., Calosi, P., McNeill, L., Mieszkowska, N., and Widdicombe, S. 2011. Predicted levels of future ocean acidification and temperature rise could alter community structure and biodiversity in marine benthic communities. *Oikos*, 120: 661–674.
- Harley, C. D. G., Hughes, A. R., Hultgren, K. M., Miner, B. G., Sorte, C. J. B., Thornber, C. S., Rodriguez, L. F., et al. 2006. The impacts of climate change in coastal marine systems. *Ecology Letters*, 9: 228–241.
- Hildebrandt, N., Niehoff, B., and Sartoris, F. J. 2014. Long-term effects of elevated CO<sub>2</sub> and temperature on the Arctic calanoid copepods *Calanus glacialis* and *C. hyperboreus*. *Marine Pollution Bulletin*, 80: 59–70.
- Hofmann, G. E., Smith, J. E., Johnson, K. S., Send, U., Levin, L. A., Micheli, F., Paytan, A., et al. 2011. High-frequency dynamics of ocean pH: a multi-ecosystem comparison. *PLoS ONE*, 6: e28983.
- Huys, R., and Boxshall, G. A. 1991. *Copepod Evolution*. The Ray Society, London, 468 pp.
- Huys, R., Gee, J. M., Moore, C. G., and Hamond, R. 1996. Marine and brackish water harpacticoid Copepods. Part I: keys and notes for identification of the species. *In Synopses of the British Fauna (New Series) no. 51*, p. 1–352. Ed. by R.S.K. Barnes and J.H. Crothers. Field Studies Council, Shrewsbury.
- IPCC. 2013. *Climate Change 2013: The Physical Science Basis. Contribution of Working Group I to the Fifth Assessment Report of the Intergovernmental Panel on Climate Change*, 1535 pp. Ed. by Stocker T.F., Qin D., Plattner G.-K., Tignor M., Allen S.K., Boschung J., Nauels A., et al. Cambridge University Press, Cambridge.
- IPCC. 2014. *Climate Change 2014: Impacts, Adaptation, and Vulnerability. Contribution of Working Group II to the Fifth Assessment Report of the Intergovernmental Panel on Climate Change*. Cambridge University Press, New York, USA, 1820 pp.
- Kitahashi, T., Kawamura, K., Kojima, S., and Shimanag, M. 2014. Bathymetric patterns of  $\alpha$  and  $\beta$  diversity of harpacticoid copepods at the genus level around the Ryukyu Trench, and turnover diversity between trenches around Japan. *Progress in Oceanography*, 123: 54–63.
- Kroeker, K. J., Micheli, F., and Gambi, M. C. 2012. Ocean acidification causes ecosystem shifts via altered competitive interactions. *Nature Climate Change*, 3: 156–159.
- Kroeker, K. J., Kordas, R. L., Crim, R., Hendriks, I. E., Ramajo, L., Singh, G. S., and Duarte, C. M. 2013. Impacts of ocean acidification on marine organisms: quantifying sensitivities and interaction with warming. *Global Change Biology*, 19: 1884–1896.
- Kurihara, H., Shimode, S., and Shirayama, Y. 2004a. Sub-lethal effects of elevated concentration of CO<sub>2</sub> on planktonic copepods and sea urchins. *Journal of Oceanography*, 60: 743–750.
- Kurihara, H., Shimode, S., and Shirayama, Y. 2004b. Effects of raised CO<sub>2</sub> concentration on the egg production rate and early development of two marine copepods (*Acartia steuri* and *Acartia erythraea*). *Marine Pollution Bulletin*, 49: 721–727.
- Lang, K. 1948. *Monographie der Harpacticiden: I: 1-896; II: 897-1682*. Lund: Håkan Ohlsson Booksellers. Stockholm, Nordiska Bökhandeln, 1682 pp.
- Lang, K. 1965. Copepoda Harpacticoida from the Californian Pacific Coast. *Kungliga Svenska Vetenskapsakademiens Handlingar. Fjärde Serien*, 10: 1–560.
- Li, W., Han, W., Dong, Y., Ishimatsu, A., Russell, B. D., and Gao, K. 2015. Combined effects of short-term ocean acidification and heat shock in a benthic copepod *Tigriopus japonicus* Mori. *Marine Biology*, 162: 1901–1912.
- Lüthi, D., Le Floch, M., Bereiter, B., Blunier, T., Barnola, J. -M., Siegenthaler, U., Raynaud, D., et al. 2008. High-resolution carbon dioxide concentration record 650,000–800,000 years before present. *Nature*, 453: 379–382.
- Mayor, D. J., Matthews, C., Cook, K., Zuur, A. F., and Hay, S. 2007. CO<sub>2</sub>-induced acidification affects hatching success in *Calanus finmarchicus*. *Marine Ecology Progress Series*, 350: 91–97.
- Mayor, D. J., Everett, N. R., and Cook, K. B. 2012. End of century ocean warming and acidification effects on reproductive success in a temperate marine copepod. *Journal of Plankton Research*, 34: 258–262.
- McArdle, B. H., and Anderson, M. J. 2001. Fitting multivariate models to community data: a comment on distance based redundancy analysis. *Ecology*, 82: 290–297.
- McConville, K., Halsband, C., Fileman, E. S., Somerfield, P. J., Findlay, H. S., and Spicer, J. I. 2013. Effects of elevated CO<sub>2</sub> on the reproduction of two calanoid copepods. *Marine Pollution Bulletin*, 73: 428–434.
- Meadows, A. S., Ingels, J., Widdicombe, S., Hale, R., and Rundle, S. D. 2015. Effects of elevated CO<sub>2</sub> and temperature on an intertidal meiobenthic community. *Journal of Experimental Marine Biology and Ecology*, 469: 44–56.
- Melatunan, S., Calosi, P., Rundle, S. D., Widdicombe, S., and Moody, A. J. 2013. Effects of ocean acidification and elevated temperature on shell plasticity and its energetic basis in an intertidal gastropod. *Marine Ecology Progress Series*, 472: 155–168.
- Pascal, P. Y., Fleeger, J. W., Galvez, F., and Carman, K. R. 2010. The toxicological interaction between ocean acidity and metals in coastal meiobenthic copepods. *Marine Pollution Bulletin*, 60: 2201–2208.
- Pinto, C. S. C., Souza-Santos, L. P., and Santos, P. J. P. 2001. Development and population dynamics of *Tisbe biminiensis* Copepoda: Harpacticoida reared on different diets. *Aquaculture*, 198: 253–267.
- Pörtner, H. O. 2008. Ecosystem effects of ocean acidification in times of ocean warming: a physiologist's view. *Marine Ecology Progress Series*, 373: 203–217.
- Pörtner, H. O., Langenbuch, M., and Reipschläger, A. 2004. Biological impact of elevated ocean CO<sub>2</sub> concentrations: lessons from animal physiology and earth history. *Journal of Oceanography*, 60: 705–718.
- Sabine, C. L., Feely, R. A., Gruber, N., Key, R. M., Lee, K., Bullister, J. L., Wanninkhof, R., et al. 2004. The oceanic sink for anthropogenic CO<sub>2</sub>. *Science*, 305: 367–371.
- Sarmento, V. C., and Santos, P. J. P. 2012. Trampling on coral reefs: tourism effects on harpacticoid copepods. *Coral Reefs*, 31: 135–146.
- Sarmento, V. C., Lage, L. M., and Santos, P. J. P. 2012. Copepoda Harpacticoida community of a rocky shore under the influence of upwelling (Arraial do Cabo, southeastern Brazil). *Journal of the Marine Biological Association of the United Kingdom*, 92: 1117–1126.
- Sarmento, V. C., Souza, T. P., Esteves, A. M., and Santos, P. J. P. 2015. Effects of seawater acidification on a coral reef meiofauna community. *Coral Reefs*, 34: 955–966.
- Sokolov, A. P., Stone, P. H., Forest, C. E., Prinn, R., Sarofim, M. C., Webster, M., Paltsev, S., et al. 2009. Probabilistic forecast for 21st century climate based on uncertainties in emissions (without policy) and climate parameters. MIT Joint Program on the Science and Policy of Global Climate Change, Rep. No. 169.
- Somerfield, P. J., Warwick, R. M., and Moens, T. 2007. Meiofauna techniques. *In Methods for the Study of Marine Benthos*, 3rd edn, pp. 229–272. Ed. by A. Eleftheriou and A. McIntyre. Blackwell Science, Oxford.
- Souza-Santos, L. P., Pastor, J. M. O., Ferreira, N. G., Costa, W. M., Castro, C. M. V. A., and Santos, P. J. P. 2006. Developing the harpacticoid copepod *Tisbe biminiensis* culture: testing for salinity tolerance, ration levels, presence of sediment and density dependent analyses. *Aquaculture Research*, 37: 1516–1523.
- Souza-Santos, L. P., Oliveira, D. D., Lima, E. S. 2015. The use of epibenthic copepod *Tisbe biminiensis* nauplii to assess the toxicity of

- seawater samples in Suape Bay (state of Pernambuco; Brazil). *Ecotoxicology and Environment Contamination*, 10: 61–69.
- Vehmaa, A., Hogfors, H., Gorokhova, E., Brutemark, A., Holmborn, T., Engström-Öst, J. 2013. Projected marine climate change: effects on copepod oxidative status and reproduction. *Ecology and Evolution*, 3: 4548–4557.
- Wells, J. B. J. 2007. An annotated checklist and keys to the species of Copepoda Harpacticoida (Crustacea). *Zootaxa*, 1568: 1–872.
- Widdicombe, S., Spicer, J. I. 2008. Predicting the impact of ocean acidification on benthic biodiversity: what can animal physiology tell us? *Journal of Experimental Marine Biology and Ecology*, 366: 187–197.
- Williams, T. D., Jones, M. B. 1999. Effects of temperature and food quantity on the reproduction of *Tisbe battagliai* (Copepoda: Harpacticoida). *Journal of Experimental Marine Biology and Ecology*, 236: 273–290.
- Williams, T. D., Jones, M. B. 1994. Effects of temperature and food quantity on postembryonic development of *Tisbe battagliai* (Copepoda: Harpacticoida). *Journal of Experimental Marine Biology and Ecology*, 183: 283–298.
- Zar, J. H. 1996. *Biostatistical Analysis*, 3rd edn. Prentice-Hall, New Jersey. 662 pp.
- Zeppilli, D., Sarrazin, J., Leduc, D., Arbizu, P. M., Fontaneto, D., Fontanier, C., Gooday, A. J., *et al.* 2015. Is the meiofauna a good indicator for climate change and anthropogenic impacts? *Marine Biodiversity*, 45: 505–535.
- Zervoudaki, S., Frangoulis, C., Giannoudi, L., Krasakopoulou, E. 2014. Effects of low pH and raised temperature on egg production, hatching and metabolic rates of a Mediterranean copepod species (*Acartia clausi*) under oligotrophic conditions. *Mediterranean Marine Science*, 15: 74–83.

Handling editor: Joanna Norkko
